# Supplementary material for: No Excess of Mortality from Lung Cancer during the COVID-19 Pandemic in an Area at Environmental Risk: Results of an Explorative Analysis
Source: MDPI journal article supplement (doi:10.3390/ijerph20085522), 2023-04-14
Supplement: s1 [file s1]

### Supplementary material

**Table S1.** Counts and percentages of the comorbidities associated with death in records where lung cancer was a main cause of death.

| Comorbidities |                                                               | n(%)     |
|---------------|---------------------------------------------------------------|----------|
| ICD10 code    | Label                                                         |          |
| C34.9         | Malignant neoplasm of bronchus and lung, unspecified          | 74(48.1) |
| E14.9         | Unspecified diabetes mellitus: Without complications          | 10(6.5)  |
| I11.9         | Hypertensive heart disease without (congestive) heart failure | 8(5.2)   |
| I10           | Essential (primary) hypertension                              | 7(4.5)   |
| I25.9         | Chronic ischaemic heart disease, unspecified                  | 6(3.9)   |
| J44.8         | Other specified chronic obstructive pulmonary disease         | 5(3.2)   |
| J44.9         | Chronic obstructive pulmonary disease, unspecified            | 5(3.2)   |
| I51.9         | Heart disease, unspecified                                    | 3(1.9)   |
| C61           | Malignant neoplasm of prostate                                | 2(1.3)   |
| I25.8         | Other forms of chronic ischaemic heart disease                | 2(1.3)   |
| I48           | Atrial fibrillation and flutter                               | 2(1.3)   |
| N18.9         | Chronic kidney disease, unspecified                           | 2(1.3)   |
| N19           | Unspecified kidney failure                                    | 2(1.3)   |
|               | Other diseases                                                | 26(16.9) |
| Total         |                                                               | 154      |

**Table S2.** Counts and percentages of the comorbidities associated with death in records where lung cancer was a secondary diagnosis.

| Comorbidities |                                                               | n(%)      |
|---------------|---------------------------------------------------------------|-----------|
| ICD10 code    | Label                                                         |           |
| I10           | Essential (primary) hypertension                              | 92(10.5)  |
| E14.9         | Unspecified diabetes mellitus: Without complications          | 81(9.2)   |
| I11.9         | Hypertensive heart disease without (congestive) heart failure | 70(8)     |
| I25.9         | Chronic ischaemic heart disease, unspecified                  | 69(7.8)   |
| J44.9         | Chronic obstructive pulmonary disease, unspecified            | 62(7.1)   |
| J44.8         | Other specified chronic obstructive pulmonary disease         | 25(2.8)   |
| I48.9         | Atrial fibrillation and atrial flutter, unspecified           | 19(2.2)   |
| I48           | Atrial fibrillation and flutter                               | 16(1.8)   |
| N18.9         | Chronic kidney disease, unspecified                           | 16(1.8)   |
|               | Other diseases                                                | 401(45.6) |
| Total         |                                                               | 851       |

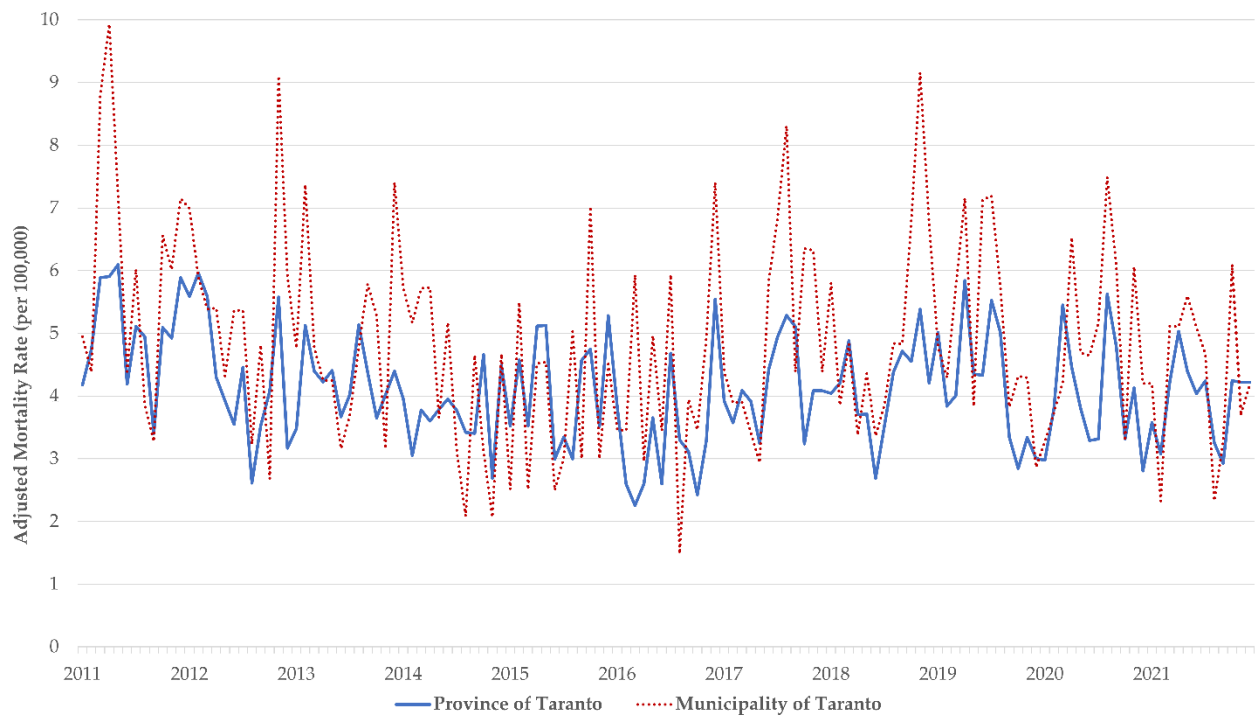

**Figure S1.** Time series of adjusted mortality rates in the province of Taranto and for the municipality of Taranto in the period 2011-2021.
